# Supplementary material for: Spatial Transcriptomics-correlated Electron Microscopy maps transcriptional and ultrastructural responses to brain injury
Source: PubMed Central journal article supplement (PMC10336148; doi:10.1038/s41467-023-39447-9), 2023-07-11
Supplement: 41467_2023_39447_MOESM3_ESM.pdf [file 41467_2023_39447_MOESM3_ESM.pdf]

## **Description of Additional Supplementary Files**

File Name: Supplementary Data 1

Description: Tables with animal info for MERFISH and SmartSeq2 datasets

File Name: Supplementary Data 2

Description: List of genes targeted in MERFISH experiments

File Name: Supplementary Data 3

Description: Gene expression signatures of identified microglial populations in SmartSeq2 dataset. Related to Figure S3.

File Name: Supplementary Data 4

Description: Gene expression signatures of microglia/macrophages collected from literature. Related to Figure S3E

File Name: Supplementary Data 5

Description: ENRICH Results of enrichment analysis of lipid-associated microglia signature. Related to Figure S3D.

File Name: Supplementary Data 6

Description: Gene Set Enrichment Analysis results of genes correlating with BODIPY
